# Supplementary material for: Optimizing multiple sclerosis diagnosis: gene expression and genomic association
Source: PubMed Central journal article supplement — Ann Clin Transl Neurol. 2015 Feb 6;2(3):271–7. doi: 10.1002/acn3.174 (PMC4369276; doi:10.1002/acn3.174), 2015-02-06
Supplement: acn30002-0271-sd1.pdf [file acn30002-0271-sd1.pdf]

| <b>Supplementary Table 1</b> |                    |                                                                            |
|------------------------------|--------------------|----------------------------------------------------------------------------|
| <b>Affymetrix ID</b>         | <b>Gene Symbol</b> | <b>Gene Title</b>                                                          |
| 200707_at                    | PRKCSH             | protein kinase C substrate 80K-H                                           |
| 201131_s_at                  | CDH1               | cadherin 1, type 1, E-cadherin (epithelial)                                |
| 201268_at                    | NME1               | non-metastatic cells 1, protein                                            |
| 202507_s_at                  | SNAP25             | synaptosomal-associated protein, 25kDa                                     |
| 203675_at                    | NUCB2              | nucleobindin 2                                                             |
| 205010_at                    | GNL3L              | guanine nucleotide binding protein-like 3 (nucleolar)-like                 |
| 205022_s_at                  | FOXN3              | forkhead box N3                                                            |
| 205207_at                    | IL6                | interleukin 6 (interferon, beta 2)                                         |
| 205316_at                    | SLC15A2            | solute carrier family 15 (H+/peptide transporter), member 2                |
| 205317_s_at                  | SLC15A2            | solute carrier family 15 (H+/peptide transporter), member 2                |
| 205841_at                    | JAK2               | Janus kinase 2                                                             |
| 206504_at                    | CYP24A1            | cytochrome P450, family 24, subfamily A, polypeptide 1                     |
| 207940_x_at                  | CNR1               | cannabinoid receptor 1 (brain)                                             |
| 207983_s_at                  | STAG2              | stromal antigen 2                                                          |
| 208260_at                    | AVPR1B             | arginine vasopressin receptor 1B                                           |
| 208297_s_at                  | EV15               | ecotropic viral integration site 5                                         |
| 209920_at                    | BMPR2              | bone morphogenetic protein receptor, type II (serine/threonine kinase)     |
| 210018_x_at                  | MALT1              | mucosa associated lymphoid tissue lymphoma translocation gene 1            |
| 211074_at                    | FOLR1              | folate receptor 1 (adult)                                                  |
| 211836_s_at                  | MOG                | myelin oligodendrocyte glycoprotein                                        |
| 211893_x_at                  | CD6                | CD6 molecule                                                               |
| 211900_x_at                  | CD6                | CD6 molecule                                                               |
| 212076_at                    | MLL                | myeloid/lymphoid or mixed-lineage leukemia (trithorax homolog, Drosophila) |
| 213309_at                    | PLCL2              | phospholipase C-like 2                                                     |
| 213601_at                    | SLIT1              | slit homolog 1 (Drosophila)                                                |
| 214231_s_at                  | KIAA0564           | KIAA0564                                                                   |
| 215511_at                    | TCF20              | transcription factor 20 (AR1)                                              |
| 215883_at                    | CTNNA1             | Catenin (cadherin-associated protein), alpha 1, 102kDa                     |
| 216033_s_at                  | FYN                | FYN oncogene related to SRC, FGR, YES                                      |
| 216449_x_at                  | HSP90B1            | heat shock protein 90kDa beta (Grp94), member 1                            |
| 216695_s_at                  | TNKS               | tankyrase, TRF1-interacting ankyrin-related ADP-ribose polymerase          |
| 216919_at                    | TP53I11            | tumor protein p53 inducible protein 11                                     |
| 217028_at                    | CXCR4              | chemokine (C-X-C motif) receptor 4                                         |
| 217411_s_at                  | RREB1              | ras responsive element binding protein 1                                   |
| 217430_x_at                  | COL1A1             | collagen, type I, alpha 1                                                  |
| 218332_at                    | BEX1               | brain expressed, X-linked 1                                                |
| 219414_at                    | CLSTN2             | calsyntenin 2                                                              |
| 219757_s_at                  | C14orf101          | chromosome 14 open reading frame 101                                       |
| 220521_s_at                  | ATG16L1            | ATG16 autophagy related 16-like 1 (S. cerevisiae)                          |
| 220795_s_at                  | BEGAIN             | brain-enriched guanylate kinase-associated homolog (rat)                   |
| 222017_x_at                  | LRCH4              | leucine-rich repeats and calponin homology (CH) domain containing 4        |
| 222061_at                    | CD58               | CD58 molecule                                                              |
