# Supplementary material for: Optimizing multiple sclerosis diagnosis: gene expression and genomic association
Source: PubMed Central journal article supplement — Ann Clin Transl Neurol. 2015 Feb 6;2(3):271–7. doi: 10.1002/acn3.174 (PMC4369276; doi:10.1002/acn3.174), 2015-02-06
Supplement: acn30002-0271-sd2.pdf [file acn30002-0271-sd2.pdf]

| <b>Supplementary Table 2</b>           |                |                                                                                                     |
|----------------------------------------|----------------|-----------------------------------------------------------------------------------------------------|
| <b>Functions Annotation</b>            | <b>p-Value</b> | <b>Molecules</b>                                                                                    |
| <b>Migration of cells</b>              | 2.13E-05       | ATG16L1,BMP2,CD58,CDH1,CNR1,COL1A1,CTNNA1,CXCR4,FOLR1,FYN,HSP90B1,IL6,JAK2,MLL,MOG,NME2,NUCB2,SLIT1 |
| <b>Lymphocyte migration</b>            | 1.54E-05       | BMP2,CD58,COL1A1,CXCR4,FYN,IL6,JAK2,MOG                                                             |
| <b>Cell movement of T lymphocytes</b>  | 6.79E-05       | BMP2,COL1A1,CXCR4,FYN,IL6,MOG                                                                       |
| <b>Transmigration of cells</b>         | 1.00E-04       | BMP2,CDH1,COL1A1,CXCR4,IL6                                                                          |
| <b>Transmigration of T lymphocytes</b> | 1.97E-04       | BMP2,COL1A1,CXCR4                                                                                   |
| <b>Leukocyte migration</b>             | 2.50E-04       | ATG16L1,BMP2,CD58,CDH1,CNR1,COL1A1,CXCR4,FYN,IL6,JAK2,MOG                                           |
| <b>Cell movement of leukocytes</b>     | 3.63E-04       | BMP2,CD58,CDH1,CNR1,COL1A1,CXCR4,FYN,IL6,JAK2,MOG                                                   |
| <b>Cell movement of phagocytes</b>     | 3.21E-03       | BMP2,CDH1,COL1A1,CXCR4,FYN,IL6,MOG                                                                  |
| <b>Adhesion of immune cells</b>        | 1.49E-03       | CD58,CD6,CDH1,CXCR4,FYN,IL6                                                                         |
