# Supplementary material for: Optimizing multiple sclerosis diagnosis: gene expression and genomic association
Source: PubMed Central journal article supplement — Ann Clin Transl Neurol. 2015 Feb 6;2(3):271–7. doi: 10.1002/acn3.174 (PMC4369276; doi:10.1002/acn3.174), 2015-02-06
Supplement: acn30002-0271-sd3.pdf [file acn30002-0271-sd3.pdf]

| <b>Supplementary Table 3</b>                  |                        |                                                                                                                                                                                                                                                                                                                    |
|-----------------------------------------------|------------------------|--------------------------------------------------------------------------------------------------------------------------------------------------------------------------------------------------------------------------------------------------------------------------------------------------------------------|
| <b>Top Functions in network</b>               | <b>Focus Molecules</b> | <b>Molecules in Network</b>                                                                                                                                                                                                                                                                                        |
| <b>Cell-mediated Immune Response</b>          | 13                     | Alp,Alpha catenin,Ap1,BMPR2,CD6,CD58,CDH1,Cg,COL1A1,Collagen type I,Collagen(s),Creb,CTNNA1,CXCR4,Cyclin D,ERK1/2,FOXN3,Growth hormone,Ifn gamma,Igm,IL1,JAK2,LDL,Lh,MAP2K1/2,Mek,NME2,NUCB2,PDGF BB,PI3K (family),Rock,STAT5a/b,Tgf beta,TNKS,TP53I11                                                             |
| <b>Cell Morphology</b>                        | 11                     | B3GNT2,BEGAIN,beta-estradiol,BEX1,CLPTM1,CLSTN2,COQ7,CYP4F8,DTD1,EVI5,FOLR1,FXYP5,GBA3,GIMAP1,HID1,LRCH4,MAPK1,PIP4K2C,PRKCSH,PRKDC,QSOX1,RBM38,RREB1,SLC35B2,SLC39A3,SLC39A6,SLIT1,SOD2,SSU72,STAG2,SYNGR2,TBCE,TCF20,UBC,ZNF300                                                                                  |
| <b>Immune Cell Trafficking</b>                | 10                     | 26s Proteasome,Akt,AMPK,ATG16L1,BCR (complex),caspase,CNR1,CYP24A1,estrogen receptor,Focal adhesion kinase,FYN,GNL3L,Hdac,Histone h4,Hsp90,HSP90B1,IgG1,Igg3,IgG,IL6,IL12 (complex),IL12 (family),Immunoglobulin,Insulin,MALT1,MOG,NFkB (complex),Nos,P38 MAPK,p85 (pik3r),PARP,SLC15A2,SRC (family),TCR,Ubiquitin |
| <b>Cell-To-Cell Signaling and Interaction</b> | 5                      | AVPR1B,BAI1,CD3,CD6,CD97,CELSR3,Ck2,ERK,FSH,Gpcr,GPR45,GPR63,GPR98,Histone h3,Jnk,LIME1,LPAR2,LPAR3,Mapk,MLL,NPY5R,PI3K (complex),Pkc(s),PLC,PLCL2,Proinsulin,Rac,Ras,Ras homolog,RNA polymerase II,S1PR2,S1PR3,S1PR4,SNAP25,Vegf                                                                                  |
